# Supplementary material for: Developing an Embedding, Koopman and Autoencoder Technologies-Based Multi-Omics Time Series Predictive Model (EKATP) for Systems Biology research
Source: Frontiers journal article supplement (doi:10.3389/fgene.2021.761629), 2021-10-26
Supplement: Presentation_3.pdf [file Presentation_3.pdf]

## Supplementary Presentation 3 Pseudocode of the EKATP

### 3.1 Pseudocode of training process

|    |                                                                                                                                                                         |                                                         |
|----|-------------------------------------------------------------------------------------------------------------------------------------------------------------------------|---------------------------------------------------------|
| 1: | <b>Input:</b> High-dimensional nonlinear time series state $\mathbf{F}^t = (f_1^t, f_2^t, \dots, f_n^t)'$ of training set, number of epochs: $e$ , predictive step: $k$ |                                                         |
| 2  | <b>For</b> $e^0 = 0, \dots, e$                                                                                                                                          |                                                         |
| 3: | $\mathbf{Y}^t \leftarrow \chi_e(\mathbf{F}^t)$                                                                                                                          | obtain low-dimensional state at time $t$ by (2)         |
|    | $\mathbf{Y}^{t+s} \leftarrow \mathcal{C}^s \mathbf{Y}^t, s \in [1, k]$                                                                                                  | obtain low-dimensional state at time $t + s$ by (8)     |
|    | $\mathbf{Y}^{t-s} \leftarrow \mathcal{D}^s \mathbf{Y}^t, s \in [1, k]$                                                                                                  | obtain low-dimensional state at time $t - s$ by (9)     |
|    | $\hat{\mathbf{F}}^{t\pm s} \leftarrow \chi_d(\mathbf{Y}^{t\pm s}), s \in [1, k]$                                                                                        | obtain high-dimensional state at time $t \pm s$ by (10) |
|    | Calculate the loss function by (15)                                                                                                                                     |                                                         |
|    | <b>End For</b>                                                                                                                                                          |                                                         |
| 4: | <b>Output:</b> trained EKATP                                                                                                                                            |                                                         |

### 3.2 Pseudocode of testing process

|    |                                                                                                                                                                |                                                       |
|----|----------------------------------------------------------------------------------------------------------------------------------------------------------------|-------------------------------------------------------|
| 1: | <b>Input:</b> High-dimensional nonlinear time series state $\mathbf{F}^t = (f_1^t, f_2^t, \dots, f_n^t)'$ of testing set, predictive step: $p$ , trained EKATP |                                                       |
| 2: | $\mathbf{Y}^t \leftarrow \chi_e(\mathbf{F}^t)$                                                                                                                 | obtain low-dimensional state at time $t$ by (2)       |
|    | $\mathbf{Y}^{t+s} \leftarrow \mathcal{C}^s \mathbf{Y}^t, s \in [1, p]$                                                                                         | obtain low-dimensional state at time $t + s$ by (8)   |
|    | $\hat{\mathbf{F}}^{t+s} \leftarrow \chi_d(\mathbf{Y}^{t+s}), s \in [1, p]$                                                                                     | obtain high-dimensional state at time $t + s$ by (10) |
| 3: | <b>Output:</b> High-dimensional predictive state $\hat{\mathbf{F}}^{t+s}, s \in [1, p]$                                                                        |                                                       |
