# Supplementary material for: Developing an Embedding, Koopman and Autoencoder Technologies-Based Multi-Omics Time Series Predictive Model (EKATP) for Systems Biology research
Source: Frontiers journal article supplement (doi:10.3389/fgene.2021.761629), 2021-10-26
Supplement: Presentation_4.pdf [file Presentation_4.pdf]

## Supplementary Presentation 4 Evaluation method

To evaluate the experimental results, we use the relative predictive error, which is computed at each time step  $t$  via Eq. 1:

$$\text{Predictive error} = \|\mathbf{F}_t - \hat{\mathbf{F}}_t\|_2 / \|\mathbf{F}_t\|_2 \quad (1)$$

where  $\mathbf{F}_t$  represents true state,  $\hat{\mathbf{F}}_t$  represents predictive state. In EKATP model and KAE model (Azencot et al. 2020), we average the errors over 30 different initial observations, where the shaded areas represent the  $\pm 1$  standard deviations.

*P.S. Our code is available at <https://github.com/suranl/EKATP>*

Reference:

Azencot, O., N. B. Erichson, V. Lin and M. Mahoney (2020). Forecasting sequential data using consistent Koopman autoencoders. International Conference on Machine Learning.
